# Supplementary material
Source: PubMed Central journal article supplement (PMC4239607)
Supplement: supp_M114.606269_jbc.M114.606269-1.pdf [file supp_M114.606269_jbc.M114.606269-1.pdf]

## **Supplementary Information for**

### **Complex *N*-linked Glycans Serve as a Determinant for Exosome/Microvesicle Cargo Recruitment**

Yaxuan Liang<sup>1</sup>, William S. Eng<sup>1</sup>, David R. Colquhoun<sup>2</sup>, Rhoel R. Dinglasan<sup>3</sup>, David R. Graham<sup>2</sup>, and Lara K. Mahal<sup>1</sup>

**Supplemental Figure 1.** A select list of interesting proteins identified from proteomic analysis. The proteins listed were detected from the DSA binding fractions of TCM and EMV, and were enriched in EMV compared to total cell membranes.

| <b>DSA-associated proteins<br/>enriched in EMV</b> |
|----------------------------------------------------|
| G3BP                                               |
| EWI-2                                              |
| ADAM10                                             |
| Na/K-transporting ATPase                           |
| CD81                                               |
| Syntenin-1                                         |
| Galectin-3                                         |
| Galectin-1                                         |
